# Supplementary material
Source: publisher figshare collection journal article supplement (https://geolsoc.figshare.com/ndownloader/files/17992913)
Supplement: Supplementary file 1 [file 17992913]

**S3. Supplementary material. Monazite standard analyses**

**Saidenbachite Monacite. Ergebirge/Germany : Massonne et al. (2007) Mineralogical Magazine 71, 371-389 : 332.4 +/- 2.1 Ma by**

**SHRIMP at Curtin University Australia (Analyst A.Kennedy)**

Ages obtained by Microprobe at Stuttgart University /Germany (Analyst: Th. Theye)

SerNo. 1 2 3 4 5 6 7 8 9 10 11 12

Comment E99-2D-A- E99-2D-A- E99-2D-A- E99-2D-A- E99-2D-A- E99-2D-A- E99-2D-A- E99-2D-A- E99-2D-A- E99-2D-A- E99-2D-A- E99-2D-A-

wSiO2 0.25 0.16 0.18 0.16 0.16 0.18 0.13 0.14 0.15 0.19 0.20 0.25

wP2O5 29.51 28.93 29.43 29.88 28.87 28.85 29.20 29.18 29.15 28.26 28.24 28.25

wSO3 0.00 0.00 0.00 0.01 0.00 0.00 0.05 0.00 0.05 0.00 0.00 0.00

wAs2O5 0.00 0.02 0.02 0.01 0.00 0.00 0.00 0.00 0.00 0.02 0.02 0.02

wCaO 0.59 0.93 0.81 0.69 1.08 0.98 0.41 0.63 0.59 1.43 1.45 1.70

wY2O3 0.00 0.32 0.28 0.31 0.32 0.33 0.28 0.34 0.30 0.35 0.35 0.40

wLa2O3 15.36 12.62 13.51 14.39 13.97 13.18 16.07 14.80 15.85 12.08 11.95 11.06

wCe2O3 31.99 28.74 30.02 31.18 29.79 29.38 32.56 31.10 31.95 27.34 27.26 25.99

wPr2O3 3.82 3.72 3.81 3.80 3.55 3.67 3.68 3.71 3.62 3.40 3.37 3.35

wNd2O3 12.86 13.42 13.61 13.00 12.25 12.97 12.12 12.63 11.86 12.45 12.53 12.59

wSm2O3 1.36 2.12 2.02 1.88 1.80 1.93 1.59 1.81 1.57 1.84 1.90 2.02

wGd2O3 0.27 1.07 0.99 0.93 0.93 0.99 0.75 0.94 0.75 0.95 0.97 1.10

wDy2O3 0.08 0.22 0.25 0.23 0.23 0.24 0.22 0.23 0.19 0.26 0.27 0.24

wEr2O3 0.03 0.05 0.05 0.04 0.06 0.06 0.05 0.05 0.05 0.05 0.05 0.06

wPbO 0.05 0.08 0.06 0.04 0.10 0.10 0.03 0.06 0.04 0.15 0.16 0.20

wThO2 2.75 4.78 3.88 2.28 3.98 4.23 1.30 2.28 2.33 7.53 7.34 8.30

wUO2 0.23 0.28 0.22 0.21 0.90 0.90 0.30 0.52 0.32 1.08 1.14 1.59

------ ------ ------ ------ ------ ------ ------ ------ ------ ------ ------ ------

wTotOx 99.16 97.47 99.12 99.05 97.98 98.02 98.74 98.42 98.75 97.39 97.21 97.13

Si 0.010 0.007 0.007 0.006 0.006 0.007 0.005 0.006 0.006 0.008 0.008 0.010

P 0.990 0.991 0.990 0.998 0.986 0.986 0.987 0.989 0.986 0.979 0.979 0.979

S 0.000 0.000 0.000 0.000 0.000 0.000 0.002 0.000 0.002 0.000 0.000 0.000

As 0.000 0.000 0.000 0.000 0.000 0.000 0.000 0.000 0.000 0.000 0.000 0.001

Ca 0.025 0.040 0.035 0.029 0.047 0.042 0.017 0.027 0.025 0.063 0.064 0.074

Y 0.000 0.007 0.006 0.007 0.007 0.007 0.006 0.007 0.006 0.008 0.008 0.009

La 0.225 0.188 0.198 0.209 0.208 0.196 0.237 0.219 0.234 0.182 0.180 0.167

Ce 0.464 0.426 0.437 0.450 0.440 0.434 0.476 0.456 0.467 0.410 0.409 0.390

Pr 0.055 0.055 0.055 0.055 0.052 0.054 0.054 0.054 0.053 0.051 0.050 0.050

Nd 0.182 0.194 0.193 0.183 0.176 0.187 0.173 0.181 0.169 0.182 0.183 0.184

Sm 0.019 0.030 0.028 0.026 0.025 0.027 0.022 0.025 0.022 0.026 0.027 0.028

Gd 0.004 0.014 0.013 0.012 0.012 0.013 0.010 0.012 0.010 0.013 0.013 0.015

Dy 0.001 0.003 0.003 0.003 0.003 0.003 0.003 0.003 0.002 0.003 0.003 0.003

Er 0.000 0.001 0.001 0.001 0.001 0.001 0.001 0.001 0.001 0.001 0.001 0.001

Pb 0.001 0.001 0.001 0.000 0.001 0.001 0.000 0.001 0.000 0.002 0.002 0.002

Th 0.025 0.044 0.035 0.020 0.037 0.039 0.012 0.021 0.021 0.070 0.068 0.077

U 0.002 0.002 0.002 0.002 0.008 0.008 0.003 0.005 0.003 0.010 0.010 0.015

O' 4.000 4.000 4.000 4.000 4.000 4.000 4.000 4.000 4.000 4.000 4.000 4.000

AGE 321.500 340.530 335.040 330.210 342.830 342.950 325.430 354.950 297.140 332.030 345.810 350.670

SiPS 1.000 0.998 0.998 1.005 0.992 0.993 0.994 0.995 0.993 0.987 0.988 0.990

SerNo. 13 14 15 16

Comment E99-2D-A- E99-2D-A- E99-2D-A- E99-2D-A-

wSiO2 0.25 0.19 0.22 0.27

wP2O5 28.07 28.21 27.85 27.70

wSO3 0.00 0.00 0.00 0.00

wAs2O5 0.03 0.01 0.02 0.03

wCaO 1.72 1.40 1.52 1.90

wY2O3 0.41 0.36 0.32 0.43

wLa2O3 10.92 12.34 11.68 10.65

wCe2O3 25.74 27.56 26.51 25.01

wPr2O3 3.31 3.33 3.29 3.17

wNd2O3 12.58 12.29 12.15 12.47

wSm2O3 2.00 1.80 1.84 2.03

wGd2O3 1.11 0.94 0.96 1.12

wDy2O3 0.26 0.24 0.23 0.29

wEr2O3 0.07 0.06 0.06 0.08

wPbO 0.20 0.15 0.18 0.22

wThO2 8.44 7.52 8.74 9.40

wUO2 1.62 0.76 1.08 1.70

------ ------ ------ ------

wTotOx 96.70 97.15 96.67 96.49

Si 0.010 0.008 0.009 0.011

P 0.978 0.979 0.975 0.972

S 0.000 0.000 0.000 0.000

As 0.001 0.000 0.000 0.001

Ca 0.076 0.061 0.067 0.085

Y 0.009 0.008 0.007 0.009

La 0.166 0.186 0.178 0.163

Ce 0.388 0.414 0.401 0.380

Pr 0.050 0.050 0.050 0.048

Nd 0.185 0.180 0.180 0.185

Sm 0.028 0.025 0.026 0.029

Gd 0.015 0.013 0.013 0.015

Dy 0.003 0.003 0.003 0.004

Er 0.001 0.001 0.001 0.001

Pb 0.002 0.002 0.002 0.002

Th 0.079 0.070 0.082 0.089

U 0.015 0.007 0.010 0.016

O' 4.000 4.000 4.000 4.000

AGE 353.780 351.210 341.380 352.710

SiPS 0.989 0.987 0.985 0.984

Basic Statistical Values of 16 Analyses

Min -Ser.No. Max -Ser.No. Mean StanDev Range

wSiO2 0.126 7 0.267 16 0.192 0.044 0.141

wP2O5 27.705 16 29.884 4 28.724 0.649 2.179

wSO3 0.000 1 0.055 9 0.007 0.018 0.055

wAs2O5 0.000 1 0.028 13 0.013 0.010 0.028

wCaO 0.407 7 1.903 16 1.114 0.476 1.496

wY2O3 0.000 1 0.428 16 0.318 0.095 0.428

wLa2O3 10.650 16 16.074 7 13.150 1.772 5.424

wCe2O3 25.014 16 32.563 7 28.883 2.460 7.549

wPr2O3 3.170 16 3.818 1 3.537 0.216 0.647

wNd2O3 11.856 9 13.608 3 12.610 0.470 1.752

wSm2O3 1.360 1 2.121 2 1.844 0.198 0.761

wGd2O3 0.267 1 1.125 16 0.923 0.205 0.858

wDy2O3 0.085 1 0.292 16 0.231 0.045 0.207

wEr2O3 0.034 1 0.078 16 0.055 0.010 0.043

wPbO 0.031 7 0.223 16 0.115 0.066 0.192

wThO2 1.304 7 9.399 16 5.318 2.783 8.095

wUO2 0.209 4 1.704 16 0.804 0.534 1.496

wTotOx 96.486 16 99.160 1 97.840 0.934 2.675

Si 0.005 7 0.011 16 0.008 0.002 0.006

P 0.972 16 0.998 4 0.984 0.007 0.026

S 0.000 1 0.002 9 0.000 0.001 0.002

As 0.000 1 0.001 16 0.000 0.000 0.001

Ca 0.017 7 0.085 16 0.049 0.021 0.067

Y 0.000 1 0.009 16 0.007 0.002 0.009

La 0.163 16 0.237 7 0.196 0.024 0.074

Ce 0.380 16 0.476 7 0.428 0.030 0.097

Pr 0.048 16 0.055 3 0.052 0.002 0.007

Nd 0.169 9 0.194 2 0.182 0.006 0.025

Sm 0.019 1 0.030 2 0.026 0.003 0.011

Gd 0.004 1 0.015 16 0.012 0.003 0.012

Dy 0.001 1 0.004 16 0.003 0.001 0.003

Er 0.000 1 0.001 16 0.001 0.000 0.001

Pb 0.000 7 0.002 16 0.001 0.001 0.002

Th 0.012 7 0.089 16 0.049 0.026 0.077

U 0.002 4 0.016 16 0.007 0.005 0.014

O' 4.000 1 4.000 1 4.000 0.000 0.000

AGE 297.140 9 354.950 8 338.636 15.084 57.810

SiPS 0.984 16 1.005 4 0.992 0.006 0.021

**Moacyr monacite (Pegmatite; Brasil) dated by Dumond et al. (2008) Chemical Geology 254, 175–196 : 505±2 Ma by ID Tims at Geological Survey Canada (Analyst W.J.Davis)**

Ages obtained by Microprobe at Stuttgart University /Germany (Analyst: Th. Theye)

SerNo. 1 2 3 4 5 6 7 8 9 10 11 12

No. 1 2 3 4 5 6 7 8 9 10 11 12

Pos_X 780 848 916 984 1052 1120 1187 1255 1323 1391 1459 1527

Pos_Y 871.0002 881.0002 892.0002 902.0002 913.0002 923.0002 934.0002 944.0002 955.0002 965.0002 976.0002 986.0002

Comment std507Ma std507Ma std507Ma std507Ma std507Ma std507Ma std507Ma std507Ma std507Ma std507Ma std507Ma std507Ma

wSiO2 1.0996 1.1039 1.0932 1.1039 1.0804 1.0889 1.0932 1.0868 1.0889 1.0889 1.0846 1.0782

wP2O5 28.5344 28.4130 28.7338 28.3740 28.6788 28.7933 28.5940 28.7612 28.6833 28.4015 28.6925 28.4840

wSO3 0.0100 0.0100 0.0125 0.0125 0.0150 0.0150 0.0175 0.0025 0.0075 0.0075 0.0000 0.0100

wCaO 0.1315 0.1245 0.1357 0.1329 0.1357 0.1385 0.1399 0.1385 0.1483 0.1413 0.1497 0.1427

wAs2O5 0.1074 0.0951 0.1089 0.0982 0.0982 0.0951 0.0997 0.0920 0.0936 0.0997 0.0951 0.0997

wY2O3 2.2453 2.2707 2.2668 2.2808 2.2884 2.2846 2.3011 2.2770 2.3176 2.3278 2.3405 2.3430

wLa2O3 5.1450 5.1145 5.1250 5.1250 5.0734 5.1649 5.1461 5.1696 5.1625 5.1848 5.1731 5.1883

wCe2O3 22.8575 22.8821 22.9079 22.7615 22.9243 22.7744 22.7545 22.7381 22.6163 22.7064 22.6444 22.6338

wPr2O3 3.7146 3.6760 3.6924 3.6795 3.6795 3.6947 3.6654 3.6584 3.6256 3.6385 3.6701 3.6268

wNd2O3 14.3488 14.2567 14.2578 14.2637 14.2194 14.2264 14.2485 14.2229 14.0957 14.1179 14.0969 14.0619

wSm2O3 9.6294 9.6630 9.6712 9.6677 9.7013 9.6352 9.6746 9.7732 9.7025 9.6920 9.7628 9.7291

wGd2O3 6.2103 6.2115 6.1769 6.2633 6.2195 6.2760 6.3140 6.3348 6.3152 6.3728 6.3878 6.3590

wDy2O3 1.0134 0.9950 1.0077 1.0214 0.9882 1.0191 1.0191 1.0318 1.0283 0.9927 1.0329 1.0398

wPbO 0.1081 0.1123 0.1133 0.1089 0.1122 0.1089 0.1110 0.1101 0.1098 0.1130 0.1119 0.1119

wThO2 4.2728 4.3058 4.3218 4.3286 4.3104 4.3502 4.3149 4.3172 4.3252 4.3559 4.3377 4.3365

wUO2 0.2478 0.2499 0.2657 0.2577 0.2544 0.2451 0.2567 0.2657 0.2657 0.2666 0.2645 0.2690

wTotOx 99.6760 99.4839 99.8905 99.4796 99.7789 99.9103 99.7504 99.9797 99.5861 99.5075 99.8444 99.5139

Si 0.0438 0.0441 0.0434 0.0441 0.0429 0.0431 0.0435 0.0431 0.0433 0.0435 0.0431 0.0430

P 0.9620 0.9608 0.9646 0.9600 0.9643 0.9657 0.9627 0.9651 0.9654 0.9606 0.9644 0.9622

S 0.0003 0.0003 0.0004 0.0004 0.0004 0.0004 0.0005 0.0001 0.0002 0.0002 0.0000 0.0003

As 0.0022 0.0020 0.0023 0.0021 0.0020 0.0020 0.0021 0.0019 0.0019 0.0021 0.0020 0.0021

Ca 0.0056 0.0053 0.0058 0.0057 0.0058 0.0059 0.0060 0.0059 0.0063 0.0060 0.0064 0.0061

Y 0.0476 0.0483 0.0478 0.0485 0.0484 0.0482 0.0487 0.0480 0.0490 0.0495 0.0495 0.0498

La 0.0756 0.0753 0.0750 0.0755 0.0743 0.0755 0.0755 0.0756 0.0757 0.0764 0.0758 0.0764

Ce 0.3333 0.3346 0.3326 0.3330 0.3334 0.3303 0.3313 0.3300 0.3292 0.3321 0.3292 0.3306

Pr 0.0539 0.0535 0.0533 0.0536 0.0532 0.0533 0.0531 0.0528 0.0525 0.0530 0.0531 0.0527

Nd 0.2041 0.2034 0.2019 0.2036 0.2017 0.2013 0.2024 0.2013 0.2001 0.2014 0.1999 0.2004

Sm 0.1321 0.1330 0.1322 0.1331 0.1328 0.1315 0.1326 0.1335 0.1329 0.1334 0.1336 0.1338

Gd 0.0820 0.0822 0.0812 0.0830 0.0819 0.0824 0.0832 0.0832 0.0832 0.0844 0.0841 0.0841

Dy 0.0130 0.0128 0.0129 0.0132 0.0126 0.0130 0.0131 0.0132 0.0132 0.0128 0.0132 0.0134

Pb 0.0012 0.0012 0.0012 0.0012 0.0012 0.0012 0.0012 0.0012 0.0012 0.0012 0.0012 0.0012

Th 0.0387 0.0391 0.0390 0.0394 0.0390 0.0392 0.0390 0.0389 0.0391 0.0396 0.0392 0.0394

U 0.0022 0.0022 0.0023 0.0023 0.0022 0.0022 0.0023 0.0023 0.0024 0.0024 0.0023 0.0024

SiPAsS 1.0083 1.0072 1.0106 1.0066 1.0097 1.0113 1.0088 1.0102 1.0109 1.0064 1.0095 1.0076

AGE 501.5200 516.3400 514.4800 496.7500 513.9900 498.4100 507.6700 500.3000 498.5900 509.2900 506.7700 505.4000

Basic Statistical Values of 12 Analyses

Min -Ser.No. Max -Ser.No. Mean StanDev Range

wSiO2 1.0782 12 1.1039 2 1.0909 0.0083 0.0257

wP2O5 28.3740 4 28.7933 6 28.5953 0.1495 0.4193

wSO3 0.0000 11 0.0175 7 0.0100 0.0051 0.0175

wCaO 0.1245 2 0.1497 11 0.1383 0.0070 0.0252

wAs2O5 0.0920 8 0.1089 3 0.0986 0.0052 0.0169

wY2O3 2.2453 1 2.3430 12 2.2953 0.0310 0.0978

wLa2O3 5.0734 5 5.1883 12 5.1477 0.0335 0.1149

wCe2O3 22.6163 9 22.9243 5 22.7668 0.1072 0.3080

wPr2O3 3.6256 9 3.7146 1 3.6685 0.0274 0.0889

wNd2O3 14.0619 12 14.3488 1 14.2014 0.0874 0.2869

wSm2O3 9.6294 1 9.7732 8 9.6918 0.0452 0.1438

wGd2O3 6.1769 3 6.3878 11 6.2868 0.0710 0.2109

wDy2O3 0.9882 5 1.0398 12 1.0158 0.0169 0.0516

wPbO 0.1081 1 0.1133 3 0.1109 0.0017 0.0052

wThO2 4.2728 1 4.3559 10 4.3231 0.0220 0.0831

wUO2 0.2451 6 0.2690 12 0.2591 0.0083 0.0239

wTotOx 99.4796 4 99.9797 8 99.7001 0.1831 0.5001

Si 0.0429 5 0.0441 4 0.0434 0.0004 0.0012

P 0.9600 4 0.9657 6 0.9632 0.0020 0.0057

S 0.0000 11 0.0005 7 0.0003 0.0002 0.0005

As 0.0019 8 0.0023 3 0.0021 0.0001 0.0004

Ca 0.0053 2 0.0064 11 0.0059 0.0003 0.0010

Y 0.0476 1 0.0498 12 0.0486 0.0007 0.0022

La 0.0743 5 0.0764 10 0.0755 0.0006 0.0021

Ce 0.3292 11 0.3346 2 0.3316 0.0018 0.0055

Pr 0.0525 9 0.0539 1 0.0532 0.0004 0.0014

Nd 0.1999 11 0.2041 1 0.2018 0.0014 0.0042

Sm 0.1315 6 0.1338 12 0.1329 0.0007 0.0022

Gd 0.0812 3 0.0844 10 0.0829 0.0010 0.0032

Dy 0.0126 5 0.0134 12 0.0130 0.0002 0.0007

Pb 0.0012 1 0.0012 10 0.0012 0.0000 0.0001

Th 0.0387 1 0.0396 10 0.0391 0.0002 0.0009

U 0.0022 6 0.0024 12 0.0023 0.0001 0.0002

SiPAsS 1.0064 10 1.0113 6 1.0089 0.0017 0.0049

AGE 496.7500 4 516.3400 2 505.7925 6.7914 19.5900
